# Supplementary material
Source: HighWire-hosted journal article supplement (https://bmjopen.bmj.com/content/14/5/e080579)
Supplement: inline-supplementary-material-3 [file inline-supplementary-material-3.pdf]

Supplemental Table 2. Age-specific differences in epidemiology and characteristics of OHCA due to drowning

| Epidemiologic factor              | Age group                    |                             | Crude OR (95% CI)<br>with > 35y as<br>reference or P value |
|-----------------------------------|------------------------------|-----------------------------|------------------------------------------------------------|
|                                   | Older<br>> 35y<br>N = 15,142 | Younger<br>≤ 35y<br>N = 869 |                                                            |
| Year 2016–2017, % (N)             | 49.0% (7,419)                | 51.7% (449)                 | 1.13 (0.97–1.28)                                           |
| Private/public bathrooms          | 81.0%<br>(12,269)            | 45.8% (398)                 | 0.20 (0.17–0.23)                                           |
| Outdoor                           | 18.7% (2,837)                | 54.0% (469)                 | 5.09 (4.42–5.85)                                           |
| Weekend, % (N)                    | 30.5% (4,614)                | 36.1% (314)                 | 1.29 (1.12–1.49)                                           |
| Summer, % (N)                     | 12.3% (1,868)                | 38.7% (336)                 | 4.48 (3.88–5.18)                                           |
| Winter, % (N)                     | 44.5% (6,743)                | 21.2% (184)                 | 0.33 (0.28–0.39)                                           |
| Non-medical (accidental)          | 69.5%<br>(10,523)            | 88.3% (767)                 | 3.30(2.68–4.07)                                            |
| Male, % (N)                       | 51.7% (7,821)                | 66.9% (581)                 | 1.89 (1.63–2.18)                                           |
| Witnessed, % (N)                  | 5.9% (894)                   | 22.0% (191)                 | 4.49 (3.77–5.34)                                           |
| Bystander CPR                     | 46.1% (6,984)                | 59.3% (515)                 | 1.70 (1.48–1.95)                                           |
| Shockable initial rhythm, % (N)   | 1.1% (172)                   | 2.4% (21)                   | 2.16 (1.36–3.41)                                           |
| Prehospital defibrillation, % (N) | 2.9% (435)                   | 5.8% (50)                   | 2.06 (1.53–2.79)                                           |

Analyzed for 16 011 non-EMS or physician-witnessed cases.
